# Supplementary material for: Vapor/liquid polymerization of ultraporous transparent and capacitive polypyrrole nanonets
Source: Royal Society of Chemistry journal article supplement (doi:10.1039/c9nr02771h), 2019-01-01
Supplement: c9nr02771h1.pdf [file c9nr02771h1.pdf]

## Electronic Supplementary Information

### Vapor/liquid polymerization of ultraporous transparent and capacitive polypyrrole nanonets

Luciano M. Santino<sup>a</sup>, Yifan Diao<sup>b</sup>, Haoru Yang<sup>a</sup>, Yang Lu<sup>b</sup>,  
Hongmin Wang<sup>a</sup>, Erica Hwang<sup>a</sup>, Julio M. D'Arcy<sup>a,b,\*</sup>

<sup>a</sup> Department of Chemistry, Washington University in St. Louis, St. Louis, MO 63130

<sup>b</sup> Institute of Materials Science and Engineering, Washington University in St. Louis, St. Louis, MO 63130

E-mail: [jdarcy@wustl.edu](mailto:jdarcy@wustl.edu)

Note: A video showing the polymerization of nanonets, subsequent processing and handling is available free of charge online.

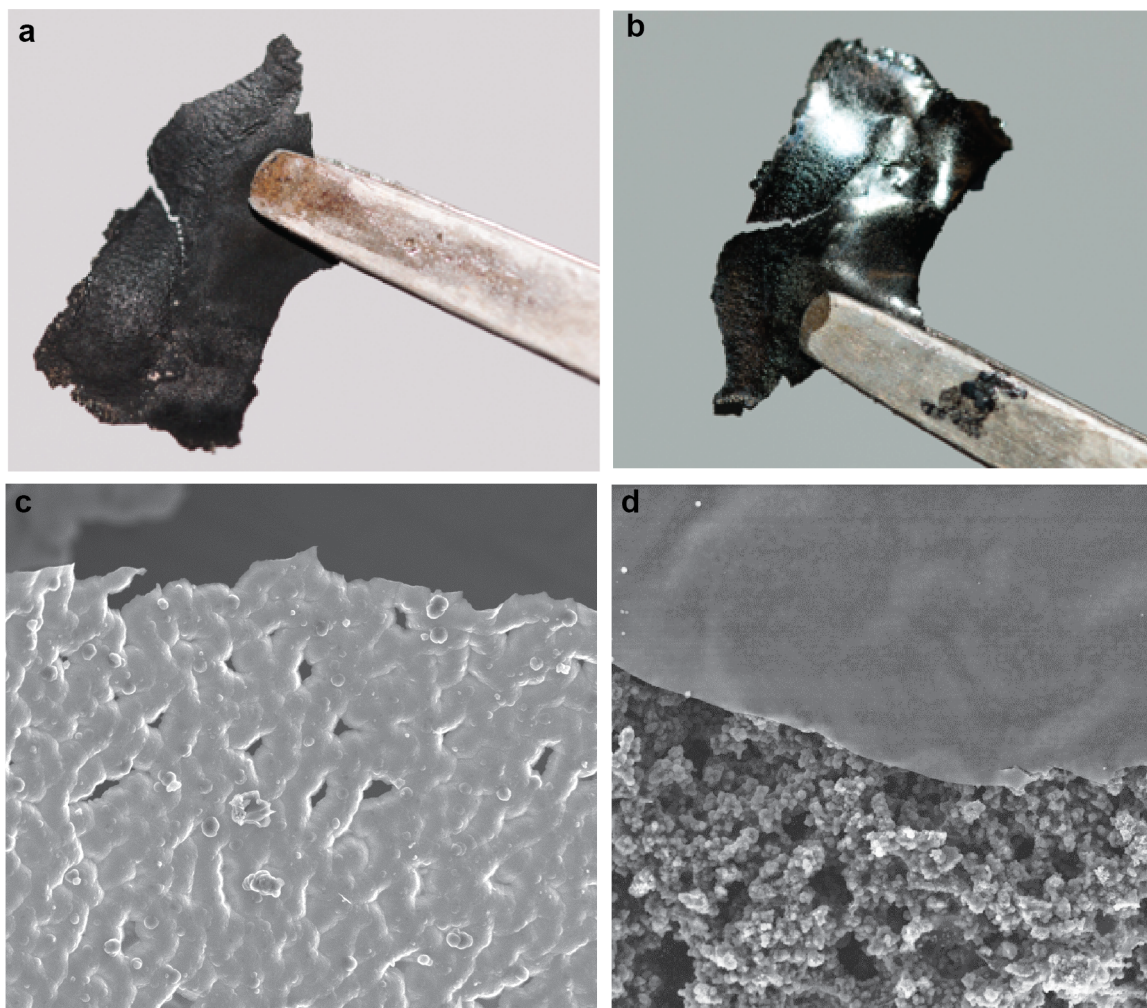

**Figure S1:** Allowing for full polymerization leads to a thick film with three distinct morphologies. (a) The vapor facing side of the film is matte. (b) The side facing the petri dish is shiny. (c) A thin film containing pinholes is visible at the vapor/liquid interface of (a). This film often detaches during processing. (d) A dense, smooth thin film forms at the substrate/oxidant interface. Granular particles are also visible at the bottom, where part of the thin film has torn.

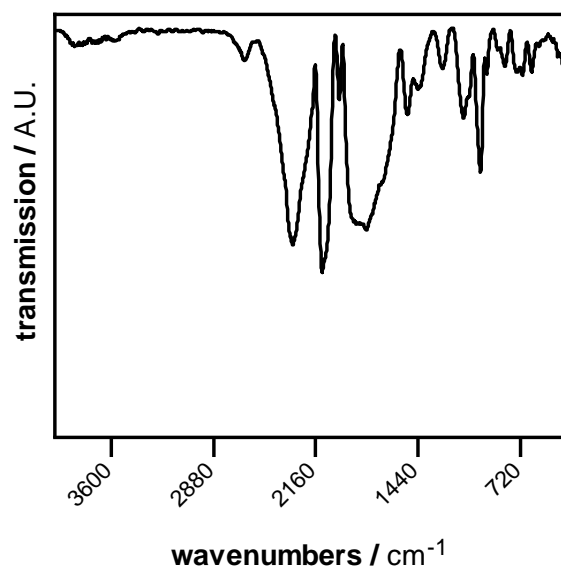

**Figure S2:** FTIR spectrum of a polypyrrole nanonet.

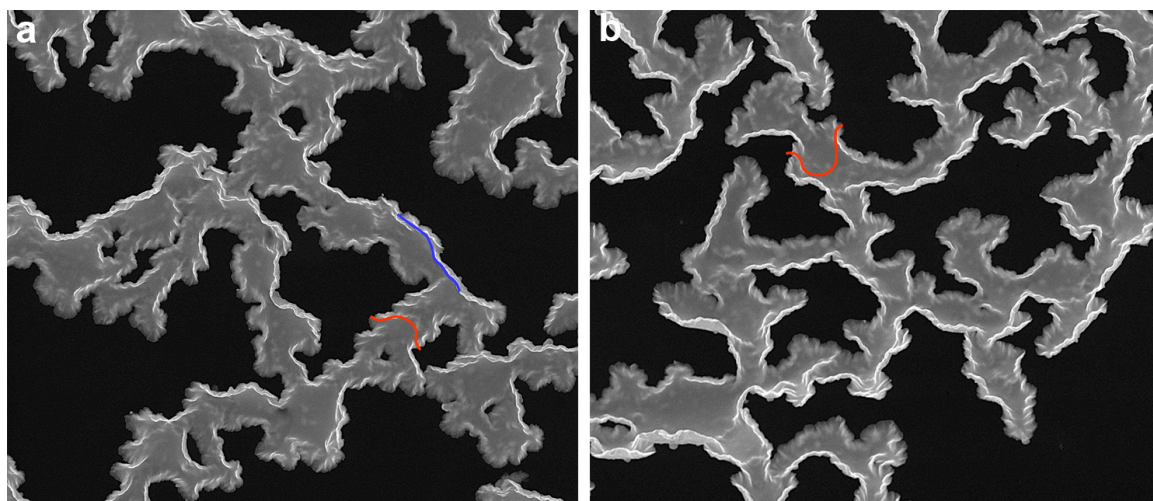

**Figure S3:** Scanning electron micrographs showing two sides of the same nanonet, convex (a) and concave (b).



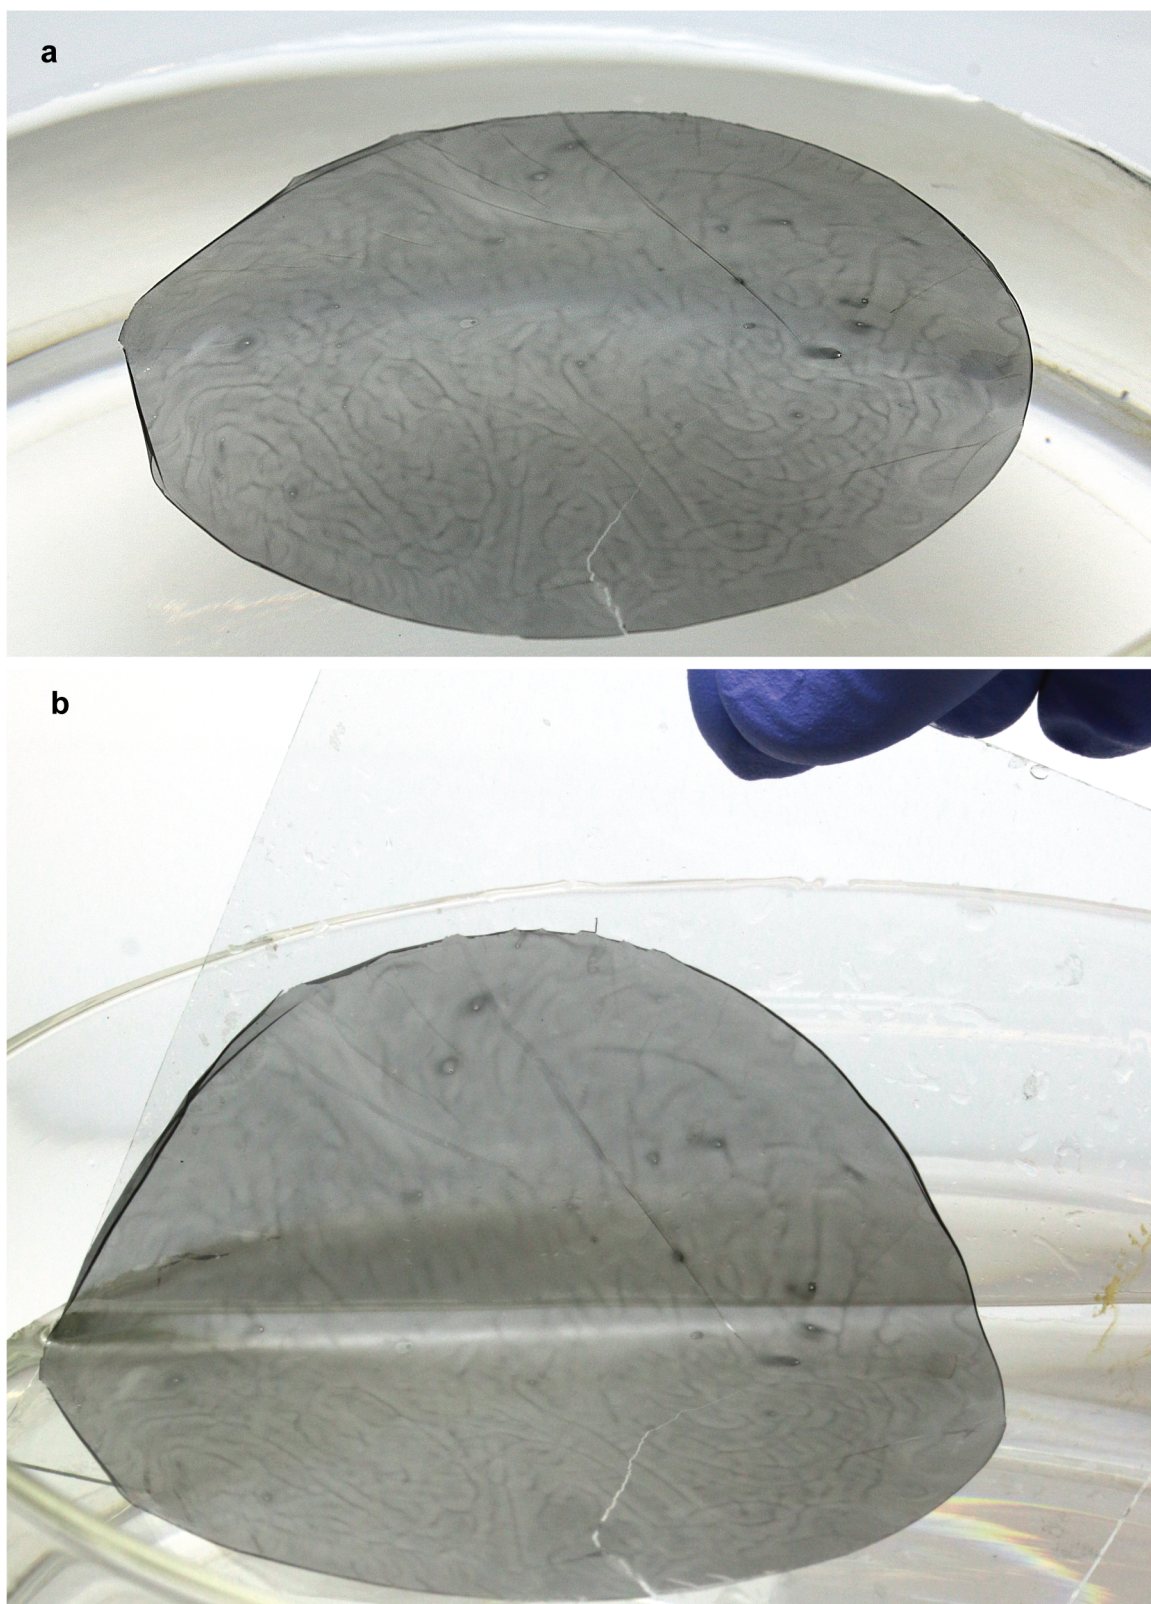

**Figure S4:** (a) A film after 90 minutes of polymerization is detached from its petri dish and floated at the air/water interface. (b) The film is picked up with a supporting glass substrate.



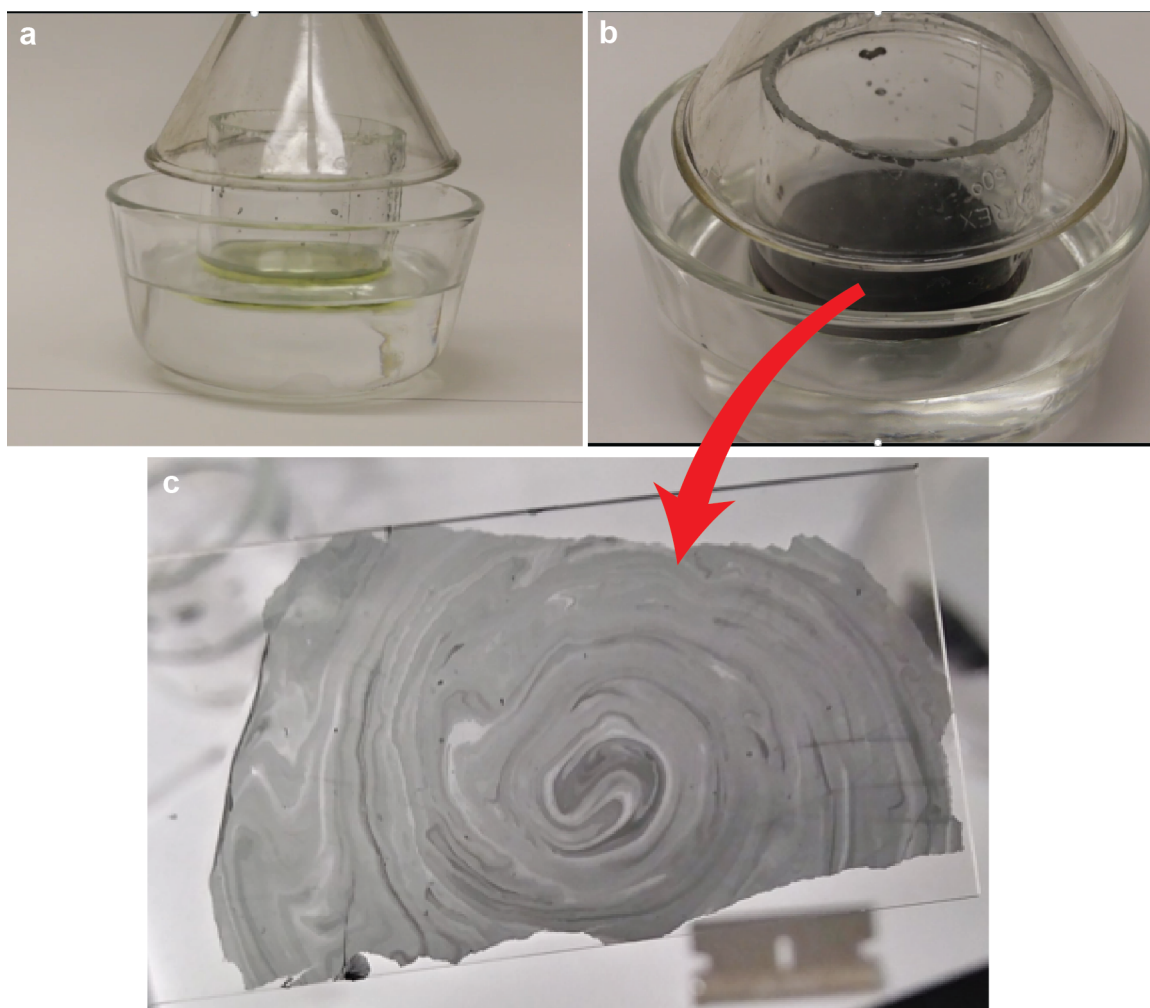

**Figure S5:** (a) Aqueous oxidant is floated on a dense immiscible organic solvent, constrained by a vertically oriented 3 cm diameter glass cylinder. Pyrrole vapor is flowed at its surface. (b) After 90 minutes of polymerization, the oxidant appears black. (c) The resulting film collected from the air-liquid interface shows a distinct spiral pattern.

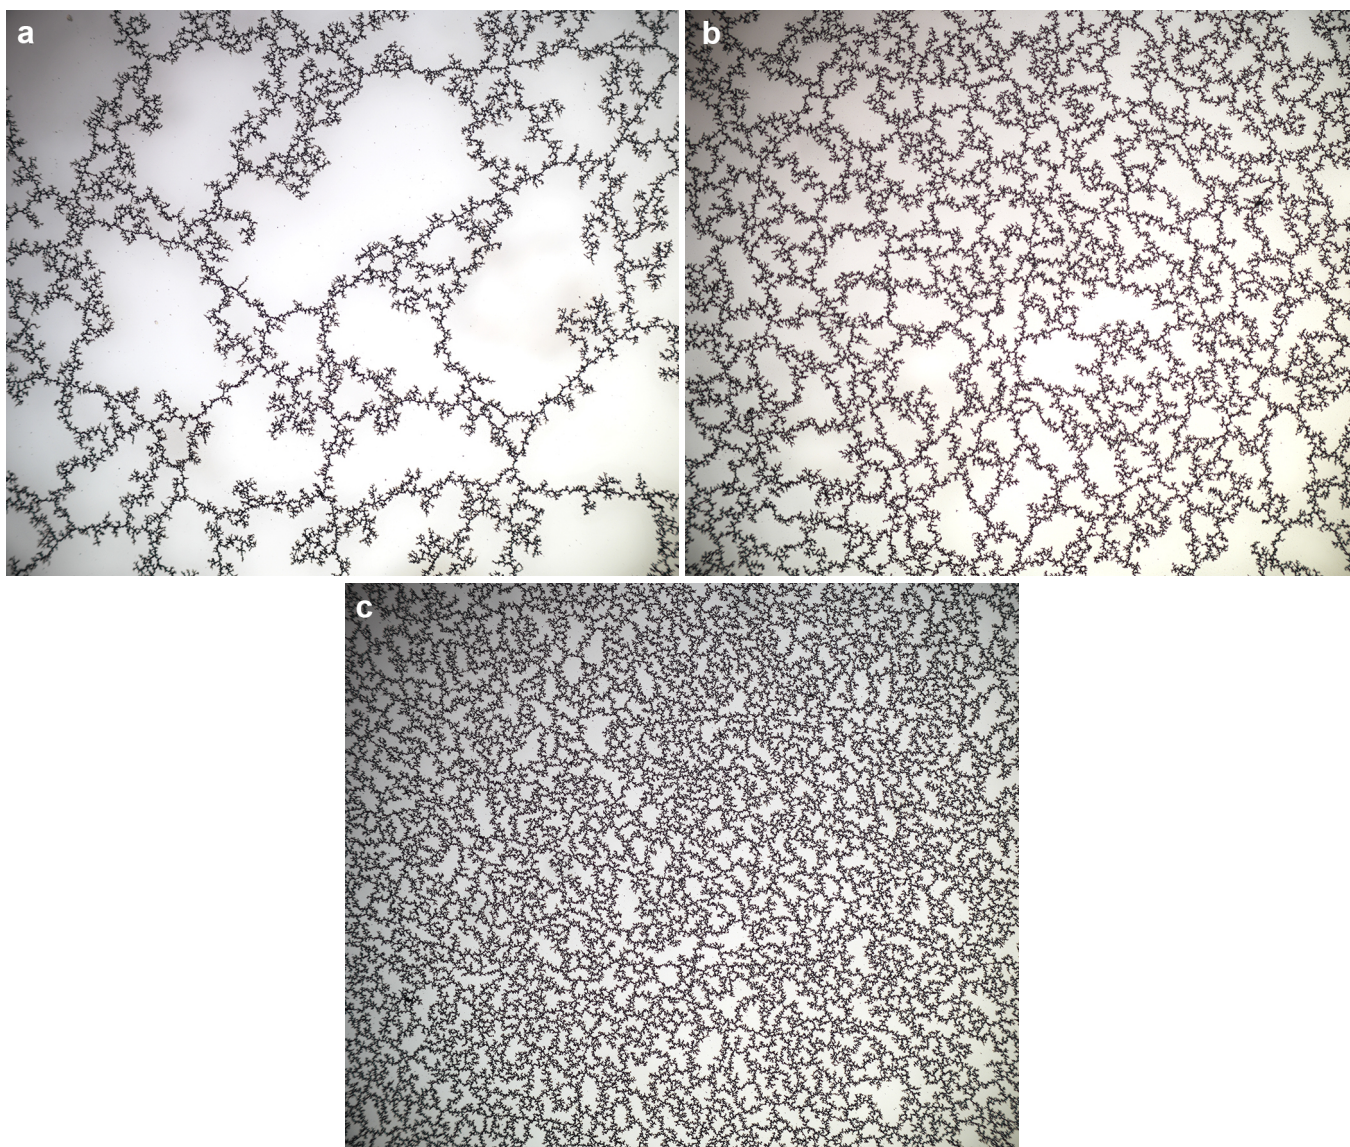

**Figure S6:** Optical micrographs at 10 $\times$  showing web density as a variable of concentration of fluorinated surfactant in oxidant. (a) 130 ppm, (b) 260 ppm, (c) 400 ppm.



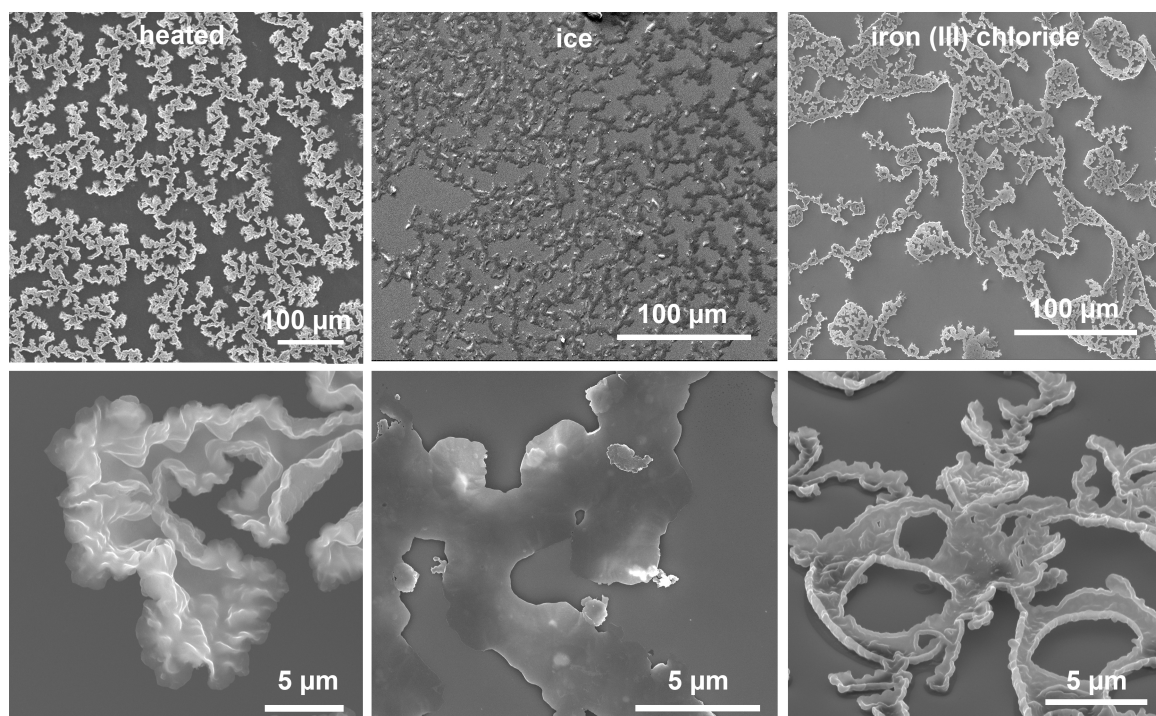

**Figure S7:** Nanonet morphology for a reaction heated to 35 °C, a reaction cooled in an ice bath, and a reaction using iron(III) chloride. All reactions 3 hours long.

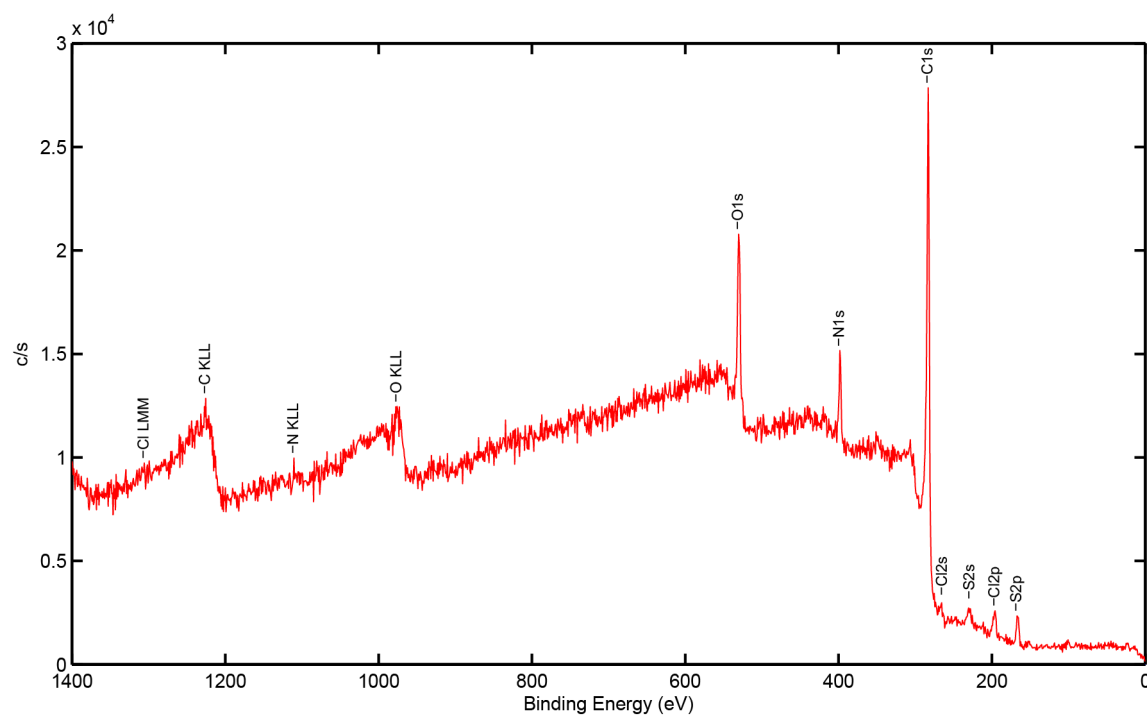

**Figure S8:** XPS survey spectrum of purified polypyrrole nanonet.
